# Supplementary material for: Boric acid catalysed hydrolysis of peroxyacids
Source: RSC Adv. 2023 Apr 14;13(17):11826–37. doi: 10.1039/d3ra01046e (PMC10103745; doi:10.1039/d3ra01046e)
Supplement: RA-013-D3RA01046E-s001 [file RA-013-D3RA01046E-s001.xlsx]

## Sheet: S1
Table S1. Data for Figure 2: pH dependence for the hydrolysis (kobs) of PAA and MCPBA at 25C. No boric acid was present. Initial peroxyacid concentrations, [P]t, were 4.0 mM and 3.5 mM for PAA and MCPBA respectively. Ionic strength was maintained at 0.2 M with sodium nitrate. All solutions contained 20 µM each of ETDA and EDTMP.
Peroxyacid	pH	kobs / s-1
PAA	3.34	2.457e-07
	5.71	1.3912e-06
	6.58	8.516e-07
	7.6	3.0118e-06
	8.44	2.97e-06
	9.03	2.554e-06
	9.58	5.6255e-06
	11.107	5.164e-06
	12.058	1.7321e-05
	12.38	3.75645e-05
MCPBA	4.25	6.52e-07
	5.44	3.91e-07
	6.23	5.22e-07
	7.18	1.3e-06
	8.18	3.91e-06
	9.67	1.3e-06
	10.9	1.3e-06
	12.21	5.22e-06
	13.14	1.83e-05

## Sheet: S2
Table S2. Data for Figure 4: pH dependence of PAA hydrolysis rate (kobsB) in the presence of 0.1 M boric acid at 25C. The initial PAA concentration, [P]t, was 4.0 mM. Ionic strength was maintained at 0.2 M with sodium nitrate. All solutions contained 20 µM each of ETDA and EDTMP.
pH	kobsB / s-1
5.76	3.07e-06
7.41	1.47e-05
7.79	1.69e-05
8.21	2.49e-05
8.6	2.73e-05
8.78	3.06e-05
8.97	3.01e-05
8.97	2.94e-05
9.14	2.99e-05
9.33	2.89e-05
9.52	2.74e-05
9.72	2.51e-05
9.98	2e-05
10.42	1.32e-05
11.53	9.72e-06

## Sheet: S3
Table S3. Data for Figure 5: Dependence of kobsB on boric acid concentration ([B]t) at pH 9.06 and pH 10.62.
pH	[B]t	kobsB / s-1
9.06	0.01	8.84e-06
9.06	0.02	1.03e-05
9.06	0.03	1.52e-05
9.06	0.04	1.85e-05
9.06	0.05	2.01e-05
9.06	0.075	2.58e-05
9.06	0.1	3.09e-05
9.06	0.125	3.43e-05
9.06	0.15	3.73e-05
9.06	0.2	4.41e-05
10.62	0.01	5.04e-06
10.62	0.02	5.74e-06
10.62	0.03	6.88e-06
10.62	0.04	7.27e-06
10.62	0.05	8.32e-06
10.62	0.075	1.05e-05
10.62	0.1	1.42e-05
10.62	0.125	1.65e-05
10.62	0.15	1.99e-05
10.62	0.2	2.8e-05

## Sheet: S4
Table S4. Data for Figure 7: pH dependence of MCPBA hydrolysis rate (kobsB) in the presence of 0.1 M boric acid at 25C. The initial PAA concentration, [P]t, was 3.52 mM. Ionic strength was maintained at 0.2 M with sodium nitrate. All solutions contained 20 µM each of ETDA and EDTMP.
pH	kobsB / s-1
3.63	6.52315e-07
3.67	5.21853e-07
3.88	1.30463e-06
6.06	3.9139e-06
6.77	1.30463e-05
7.06	2.34833e-05
7.32	3.00065e-05
7.62	3.78343e-05
7.79	3.78343e-05
7.81	4.04435e-05
8.1	4.43575e-05
8.34	4.56622e-05
8.66	4.56622e-05
8.89	4.30528e-05
9.1	3.9139e-05
9.12	3.78343e-05
9.31	3.65297e-05
9.51	3.26158e-05
9.71	2.87018e-05
9.87	2.34833e-05
10.16	1.69602e-05
12.18	1.17417e-05
